# Supplementary material for: Circulating long non-coding RNAs NKILA, NEAT1, MALAT1, and MIAT expression and their association in type 2 diabetes mellitus
Source: PubMed Central journal article supplement — BMJ Open Diabetes Res Care. 2021 Jan 12;9(1):e001821. doi: 10.1136/bmjdrc-2020-001821 (PMC7805373; doi:10.1136/bmjdrc-2020-001821), 2021-01-12
Supplement: bmjdrc-2020-001821supp001.pdf [file bmjdrc-2020-001821supp001.pdf]

| Primer sequences                                                                                 | Annealing temperature |
|--------------------------------------------------------------------------------------------------|-----------------------|
| <b>NKILA</b><br>Forward, 5'-AACCAAACCTACCCACAACG-3'<br>Reverse, 5'-ACCACTAAGTCATCCCAGGTG-3'      | 64°C                  |
| <b>NEAT1</b><br>Forward, 5'- CCTGCCTTCTTGTGCGTTTC -3'<br>Forward, 5'- CTTGTACCCTCCCAGCGTTT -3'   | 64°C                  |
| <b>MALAT1</b><br>Forward, 5'-TGGTGTCGAGGTCTTTGGTG-3'<br>Forward, 5'-AAAAGCCCTCTCAGCCACTC-3'      | 60°C                  |
| <b>MIAT</b><br>Forward, 5'-TACTCCCTCCTCACCTGCTC-3'<br>Forward, 5'-CCATCCTTGTTCCCTGTCCCC-3'       | 60°C                  |
| <b>GAPDH</b><br>Forward, 5'-GGTGGTCTCCTCTGACTTCAA -3'<br>Reverse, 5'-GTTGCTGTAGCCAAATTCGTTGT -3' | 64°C                  |

**Table 1:** Primer sequences to amplify the lncRNAs NKILA, NEAT1, MALAT1, and MIAT, with GAPDH used as an internal control.

| Variable                        | T2DM patients (%) | Controls subjects (%) |
|---------------------------------|-------------------|-----------------------|
| <b>Total no.</b>                | 200 (100)         | 200 (100)             |
| <b>Sex</b>                      |                   |                       |
| Male                            | 136 (68)          | 140 (70)              |
| Female                          | 64 (32)           | 60 (30)               |
| <b>Age at diagnosis (years)</b> |                   |                       |
| ≤ 40                            | 94 (47)           | 100 (44)              |
| > 40                            | 106 (53)          | 100 (56)              |
| <b>HTN</b>                      |                   |                       |

|                           |            |
|---------------------------|------------|
| Yes                       | 122 (61)   |
| No                        | 78 (39)    |
| <b>Nephropathy</b>        |            |
| Yes                       | 97 (48.5)  |
| No                        | 103 (51.5) |
| <b>Weight loss</b>        |            |
| Yes                       | 94 (47)    |
| No                        | 106 (53)   |
| <b>Fatigue</b>            |            |
| Yes                       | 95 (47.5)  |
| No                        | 105 (52.5) |
| <b>Slow wound healing</b> |            |
| Yes                       | 84 (42)    |
| No                        | 116 (58)   |
| <b>Retinopathy</b>        |            |
| Yes                       | 67 (33.5)  |
| No                        | 133 (76.5) |
| <b>Loss of appetite</b>   |            |
| Yes                       | 91 (45.5)  |
| No                        | 109 (54.5) |
| <b>Smoking status</b>     |            |
| Yes                       | 92 (46)    |
| No                        | 108 (54)   |
| <b>Alcoholism</b>         |            |
| Yes                       | 102 (51)   |
| No                        | 98 (49)    |

**Table 2:** Demographic and clinical characteristics of type 2 diabetes mellitus patients and healthy controls.
